# Supplementary material for: Magnetically responsive biopolymeric multilayer films for local hyperthermia
Source: Royal Society of Chemistry journal article supplement (doi:10.1039/c7tb02361h), 2017-01-01
Supplement: c7tb02361h1.pdf [file c7tb02361h1.pdf]

## Supplementary Information

### **Magnetically Responsive Biopolymeric Multilayer Films for Controlled Hyperthermia**

*Miryam Criado, Beatriz Sanz, Gerardo F. Goya, Carmen Mijangos and Rebeca Hernández\**

<sup>1</sup>Instituto de Ciencia y Tecnología de Polímeros (CSIC), c/ Juan de la Cierva, 3, 28006 Madrid, Spain

<sup>2</sup>Nanoscience Institute of Aragón, University of Zaragoza, Mariano Esquillor s/n, 50018, Zaragoza, Spain

<sup>3</sup>nB nanoscale Biomagnetics S.L., C/ Panamá 2, local 1, 50012, Zaragoza, Spain.

<sup>4</sup>Department of Condensed Matter Physics, University of Zaragoza, Pedro Cerbuna 12, 50009, Zaragoza, Spain.

\*Corresponding author:

E-mail address: rhernandez@ictp.csic.es (R. Hernández)

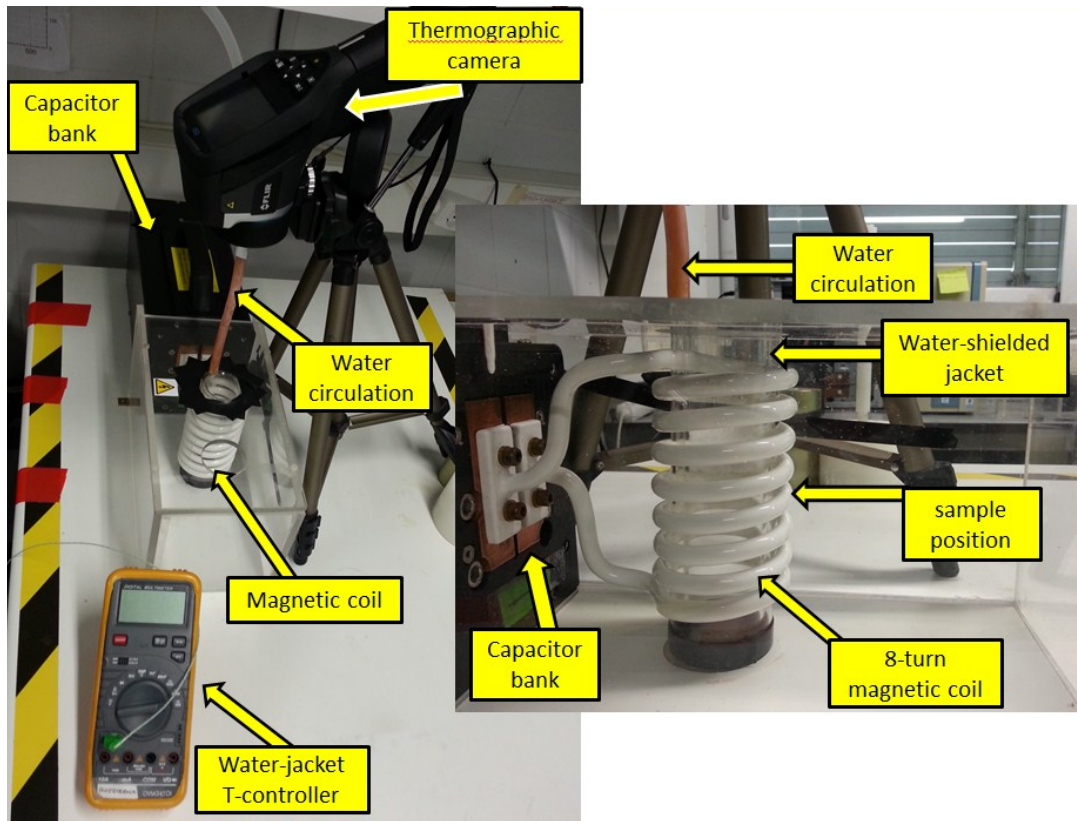

**Fig. S1:** Experimental setup for the measurement of *in vitro* magnetic hyperthermia and amplification of the sample cell setup.

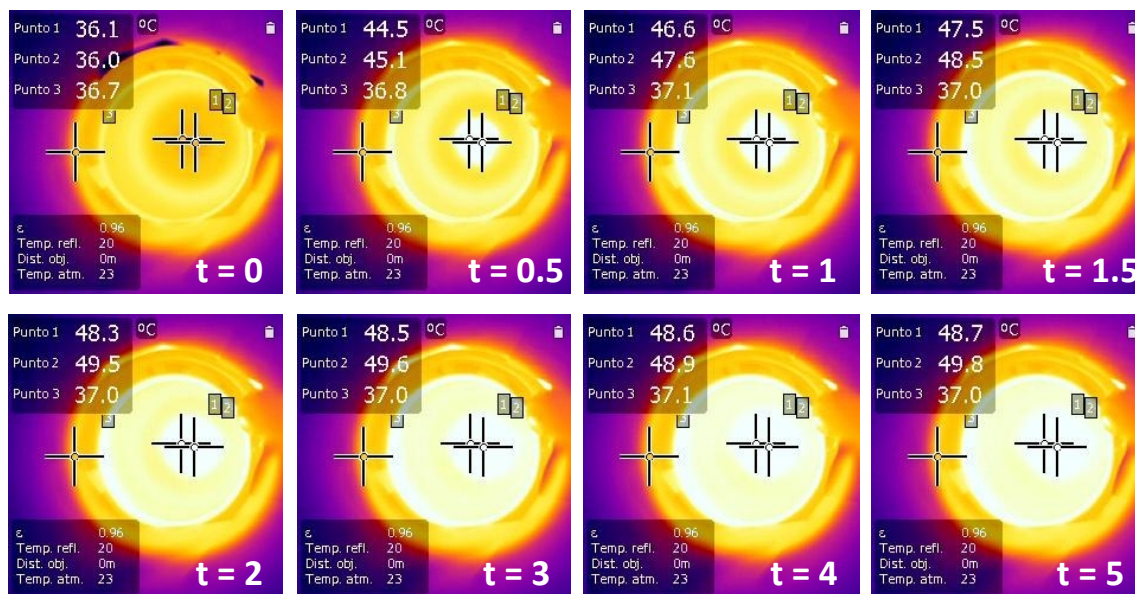

**Fig. S2:** Sequential photographs obtained by a thermal camera (FLIR Systems, USA) during the heating of a film  $(\text{Alg/Chi})_{40}(\text{NPs/Chi})_{160}$ . Time (t) is given in minutes. Points 1 and 2 represent two different points of the sample and point 3 represents the temperature of the water-heated jacket.

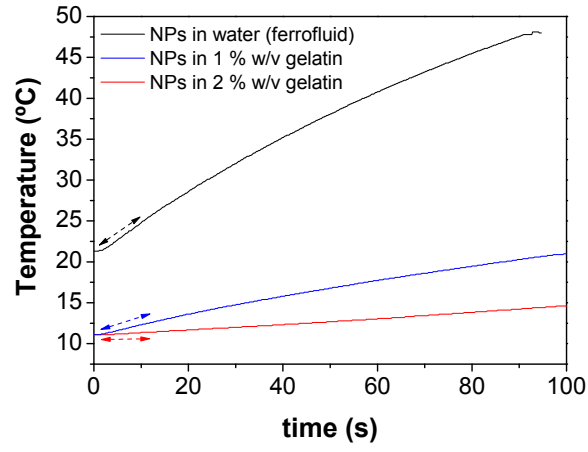

**Fig. S3:** Magnetic heating of NPs in water (black line) and in 1%w/v (blue line) and 2 %w/v gelatin (red line) at  $f = 571$  kHz and  $H = 24$  kA/m. The part of the curve employed to determine the SPA is showed by the dashed arrow.
